# Supplementary figures and images for: Harvard Personal Genome Project: lessons from participatory public research
Source: Springer Nature journal article supplement (doi:10.1186/gm527), 2014-02-28

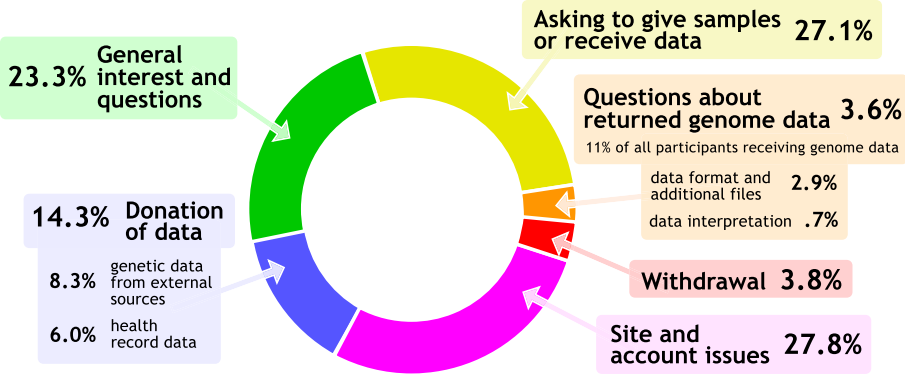

Supplement: 13073_2013_514_MOESM3_ESM.pdf [file 13073_2013_514_MOESM3_ESM.pdf]
